# Supplementary material
Source: publisher figshare collection journal article supplement (https://karger.figshare.com/ndownloader/files/8712736)

## **Supplemental figures**

**Supplemental Figure A:** Sitting Height / Height for age in boys with normal growth (with individual data point).

**Supplemental Figure B:** Sitting Height / Height for age in girls with normal growth (with individual data point).

# Supplemental Figure A

The Netherlands 1997, sitting height/height for age

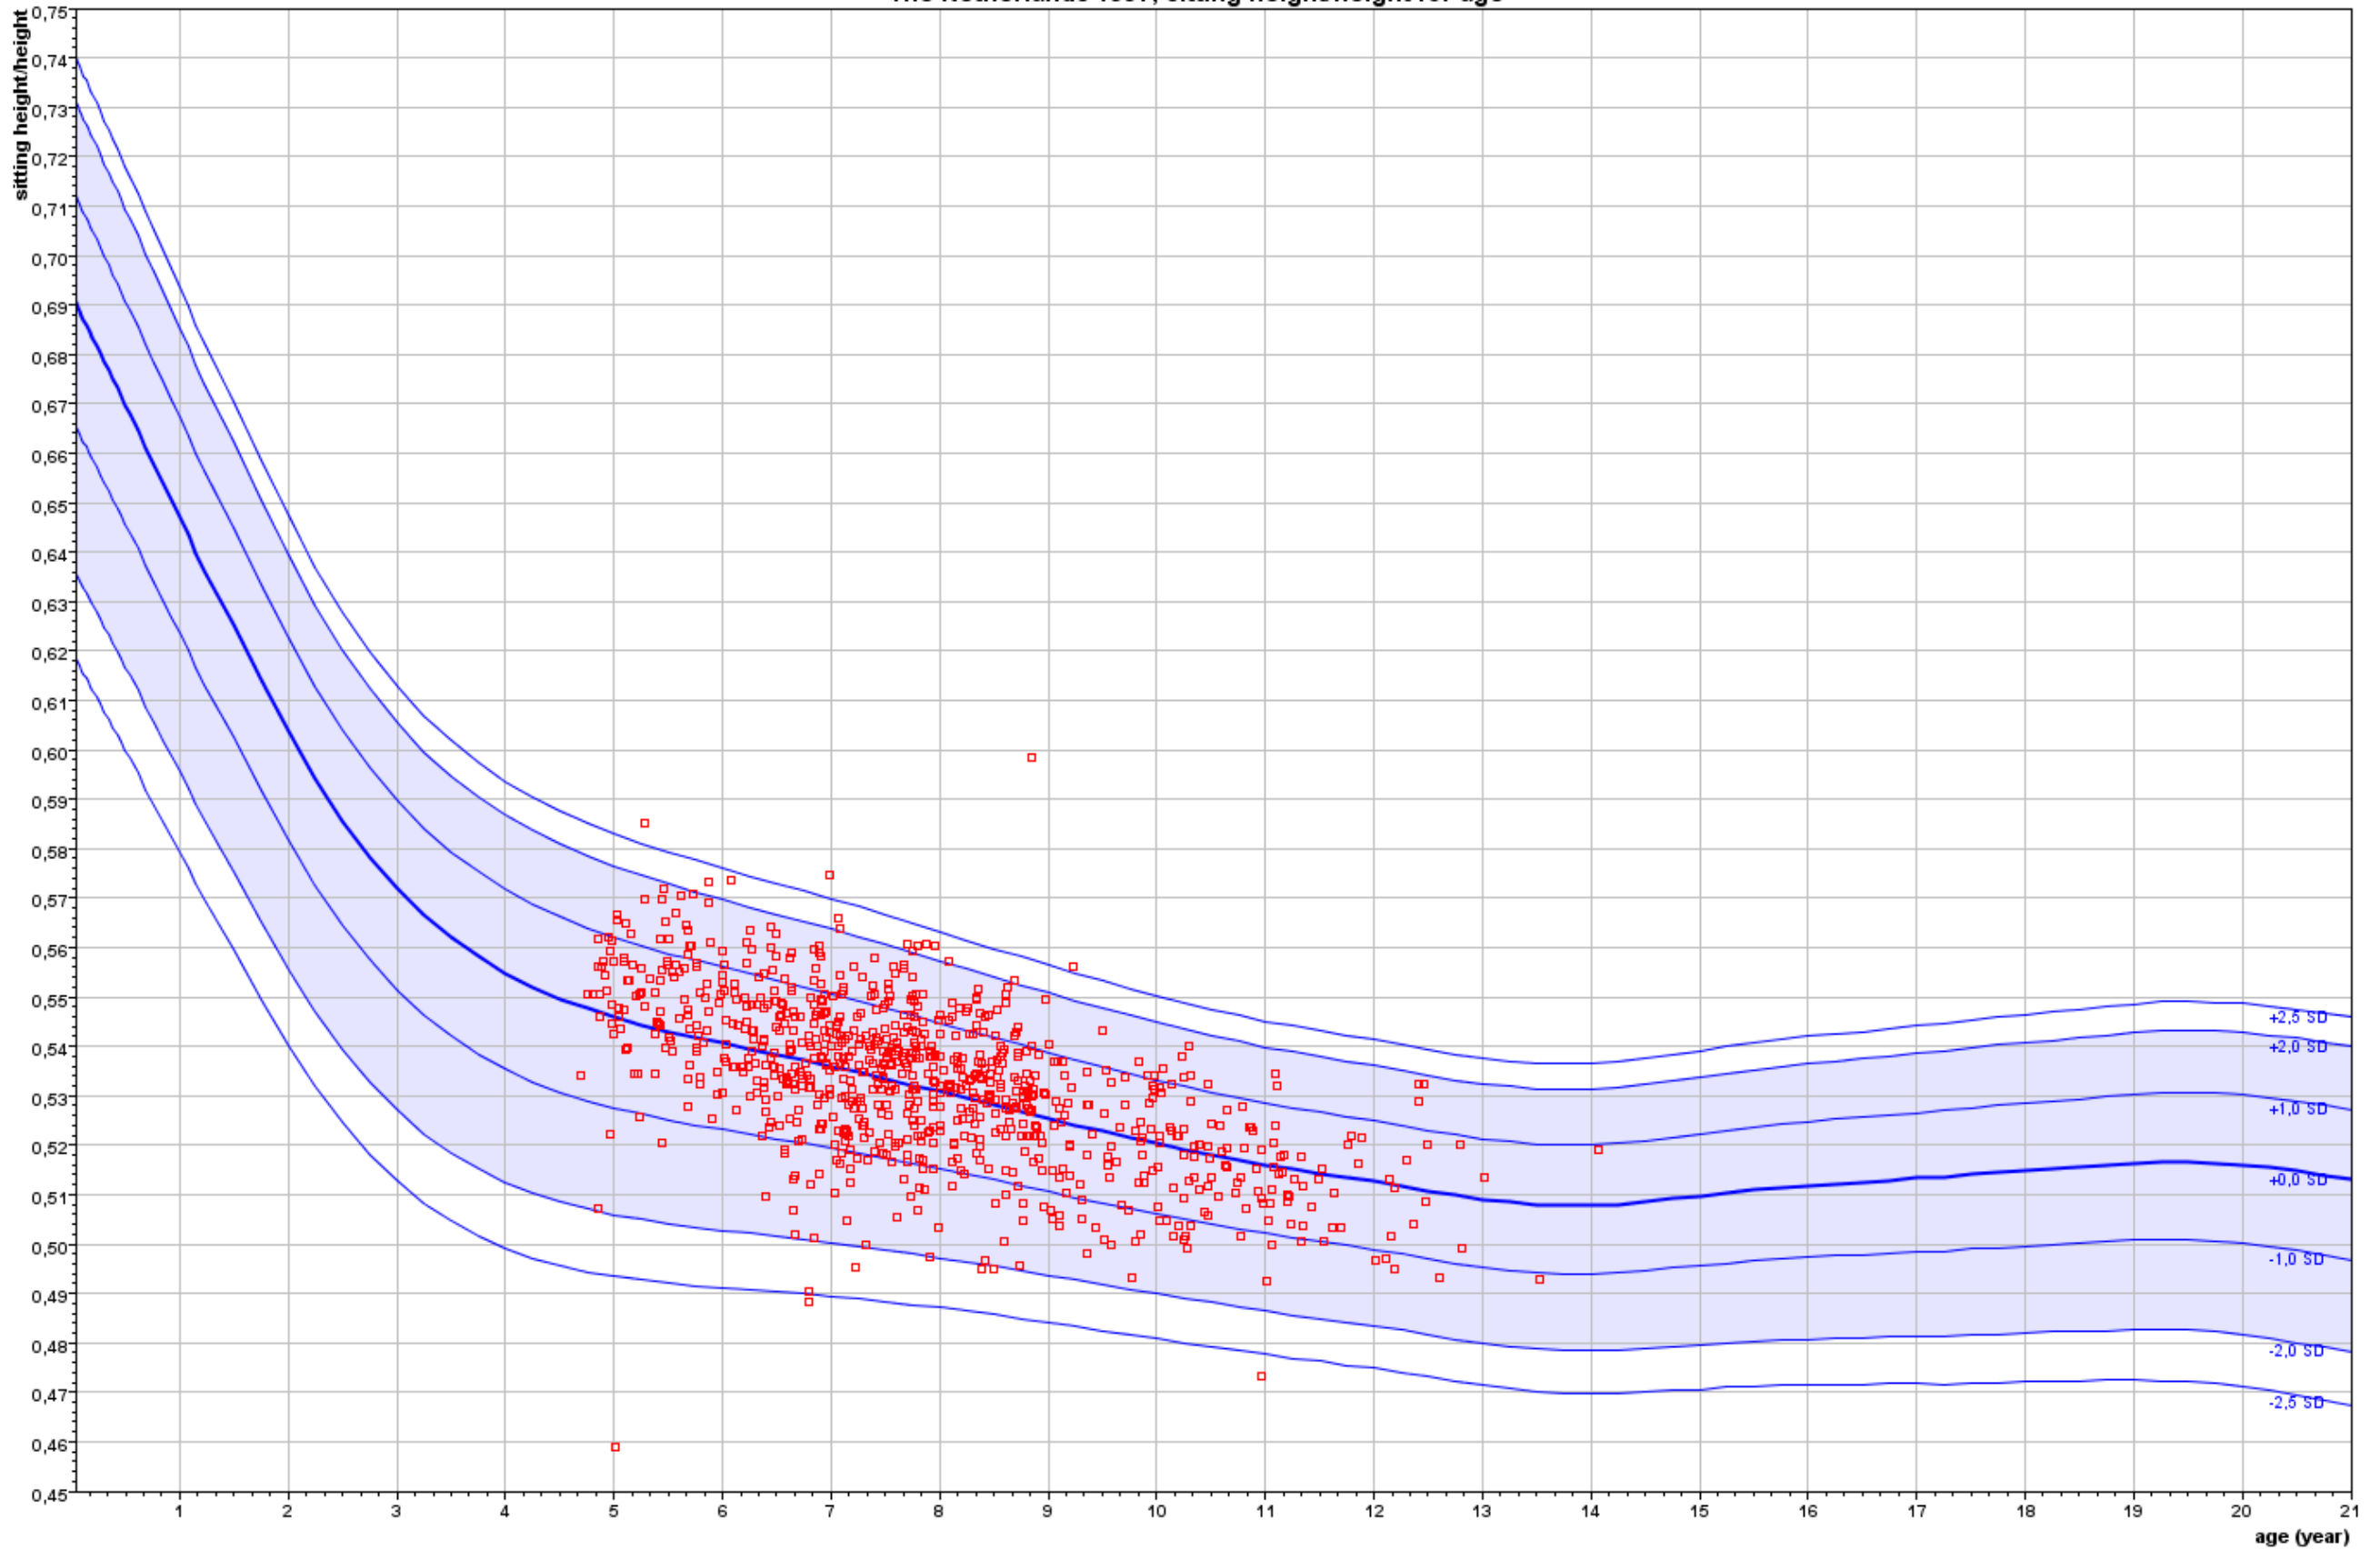

# Supplemental Figure B

The Netherlands 1997, sitting height/height for age

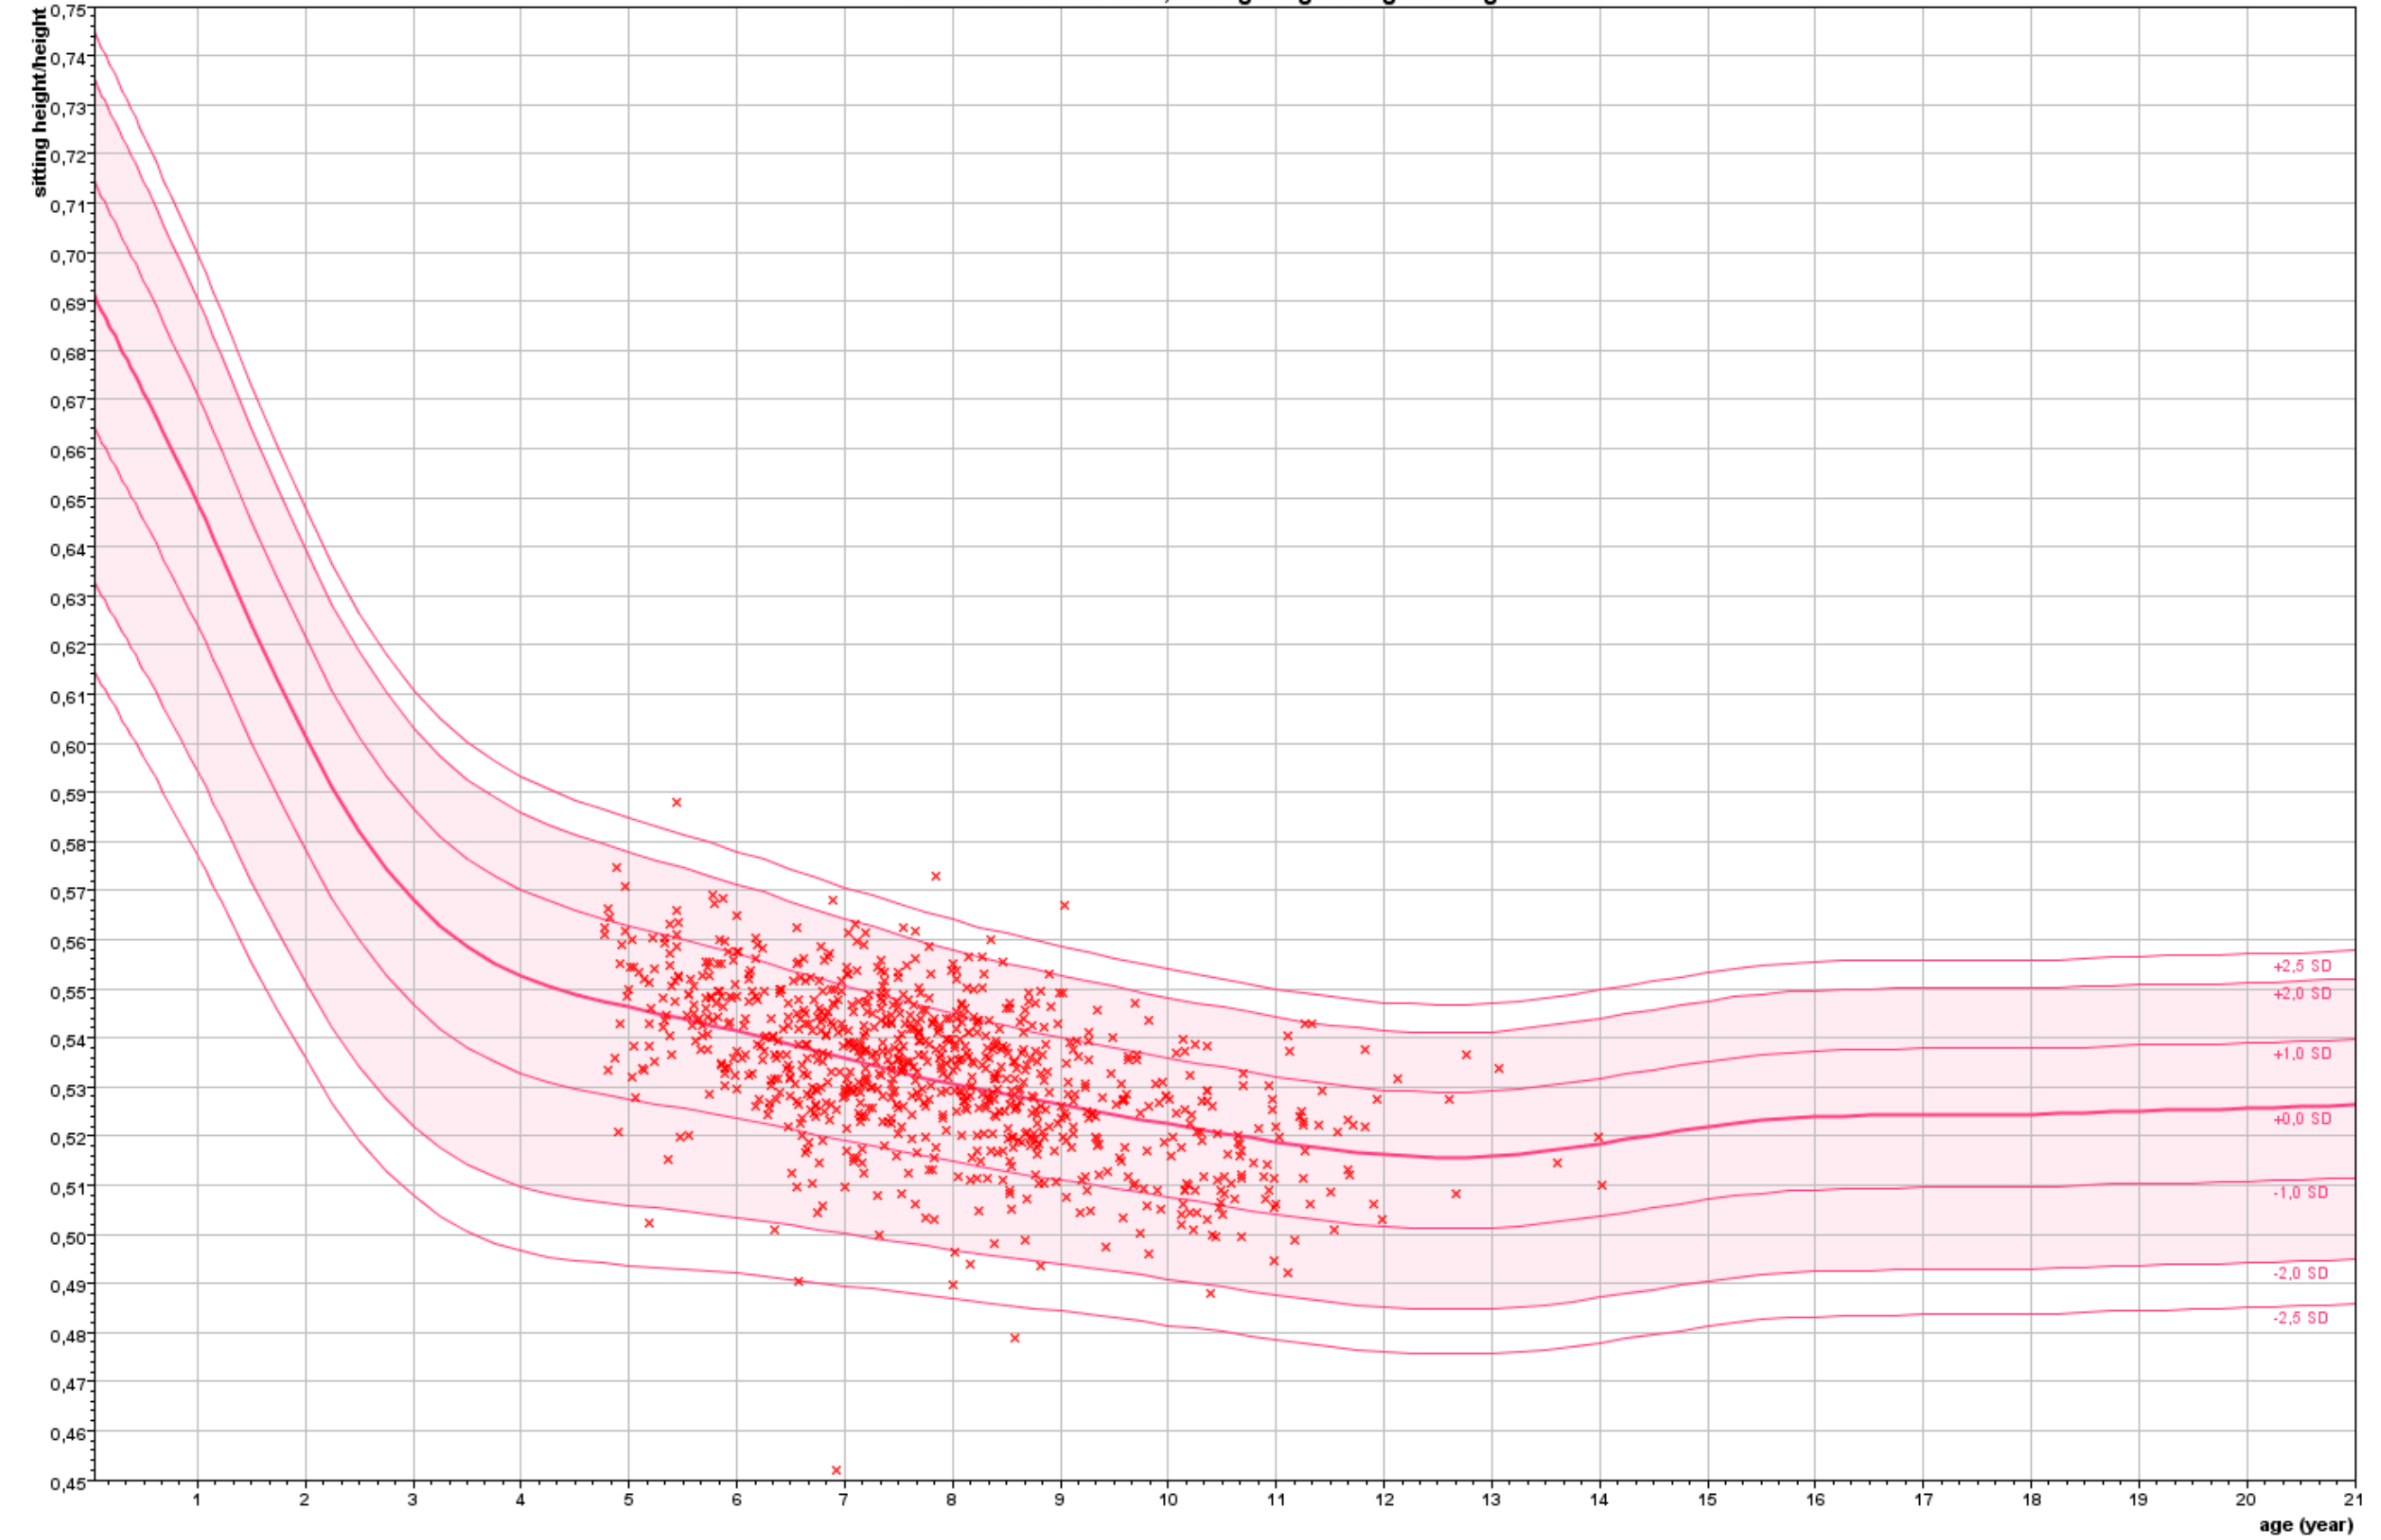

Supplement: Supplementary file 1 [file 8712736]
